# Supplementary material
Source: Research Square preprint supplement (doi:10.21203/rs.3.rs-10006450/v1)
Supplement: Supplementary file 1 [file d95b581f0a7124740e30cc36.docx]

# **Supplementary files**

**Supplementary Table 1.** Variance inflation factors for the preferred model (M2)

| **Variable** | **VIF** |
| --- | --- |
| **Specialist density (per 100 beds)** |  |
| Thoracic surgery | 2.12 |
| General surgery | 2.45 |
| Orthopedics | 1.97 |
| Otorhinolaryngology | 4.14 |
| Obstetrics & gynecology | 3.03 |
| Urology | 3.25 |
| Neurosurgery | 1.48 |
| Plastic surgery | 2.13 |
| Internal medicine | 9.51 |
| Emergency medicine | 1.60 |
| Radiology | 6.01 |
| Pediatrics | 3.53 |
| Neurology | 3.19 |
| Psychiatry | 1.77 |
| Family medicine | 1.45 |
| Dermatology | 3.26 |
| Rehabilitation medicine | 1.63 |
| Ophthalmology | 2.66 |
| **Hospital-level covariates** |  |
| Inpatient revenue share | 1.35 |
| Nursing grade | 1.98 |
| Imaging equipment | 3.02 |
| General hospital | 2.01 |
| Metropolitan area | 1.34 |
| Private hospital | 1.31 |

*Variance inflation factors from the preferred model (M2); year fixed effects and the intercept are omitted. All values are below 10, indicating no severe multicollinearity.*

**Supplementary Table 2.** Joint Wald tests of heterogeneity across the 18 specialty coefficients

| **Outcome** | **Model** | **F** | **df** | **P value** |
| --- | --- | --- | --- | --- |
| Supply expense ratio(%) | M1 | 10.99 | 17 | <0.001 |
| Supply expense ratio(%) | M2 | 3.72 | 17 | <0.001 |
| Supply expense ratio(%) | M3 | 3.10 | 17 | <0.001 |
| Log total supply expenses | M1 | 10.68 | 17 | <0.001 |
| Log total supply expenses | M2 | 4.98 | 17 | <0.001 |
| Log total supply expenses | M3 | 3.03 | 17 | <0.001 |

*Each row tests the null hypothesis that all 18 specialty-density coefficients are equal within the indicated model. Rejection indicates that the association between specialist density and the outcome differed across specialties.*

Supplementary Table 3. Supply expense structure by region, foundation type, and hospital type

| **Region** | **Foundation type** | **Hospital type** | **n** | **Supply expense ratio, mean (SD)** | **Log total supply expenses, mean (SD)** | **Total specialist density, mean (SD)** |
| --- | --- | --- | --- | --- | --- | --- |
| Non-metropolitan area | Public | Tertiary general | 40 | 34.60 (4.97) | 25.57 (0.22) | 23.43 (3.24) |
| Metropolitan area | Public | Tertiary general | 8 | 34.14 (0.88) | 26.60 (0.24) | 42.99 (3.87) |
| Non-metropolitan area | Private | Tertiary general | 48 | 34.89 (2.35) | 25.41 (0.19) | 22.58 (2.59) |
| Metropolitan area | Private | Tertiary general | 78 | 34.28 (4.06) | 25.88 (0.64) | 29.58 (5.51) |
| Non-metropolitan area | Public | General | 125 | 13.88 (6.31) | 22.42 (0.84) | 11.08 (5.62) |
| Metropolitan area | Public | General | 82 | 13.79 (9.27) | 22.87 (1.50) | 17.21 (6.86) |
| Non-metropolitan area | Private | General | 434 | 22.62 (5.61) | 23.23 (0.95) | 12.85 (9.92) |
| Metropolitan area | Private | General | 304 | 23.46 (6.64) | 23.56 (1.12) | 18.56 (9.14) |
| Total |  |  | 1119 | 23.08 (8.56) | 23.59 (1.38) | 16.70 (10.02) |

*Values are means and standard deviations unless otherwise indicated.*
